# Supplementary material for: The potential of Orbiting Carbon Observatory-2 data to reduce the uncertainties in CO 2 surface fluxes over Australia using a variational assimilation scheme
Source: Copernicus journal article supplement (doi:10.5194/acp-20-8473-2020), 2020-07-21
Supplement: Supplementary file 1 [file acp-20-8473-2020-supplement.pdf]

Supplement of Atmos. Chem. Phys., 20, 8473–8500, 2020  
<https://doi.org/10.5194/acp-20-8473-2020-supplement>  
© Author(s) 2020. This work is distributed under  
the Creative Commons Attribution 4.0 License.

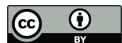

*Supplement of*

## **The potential of Orbiting Carbon Observatory-2 data to reduce the uncertainties in CO<sub>2</sub> surface fluxes over Australia using a variational assimilation scheme**

**Yohanna Villalobos et al.**

*Correspondence to:* Yohanna Villalobos (yvillalobos@student.unimelb.edu.au)

The copyright of individual parts of the supplement might differ from the CC BY 4.0 License.

## 1 Analysis of wind direction

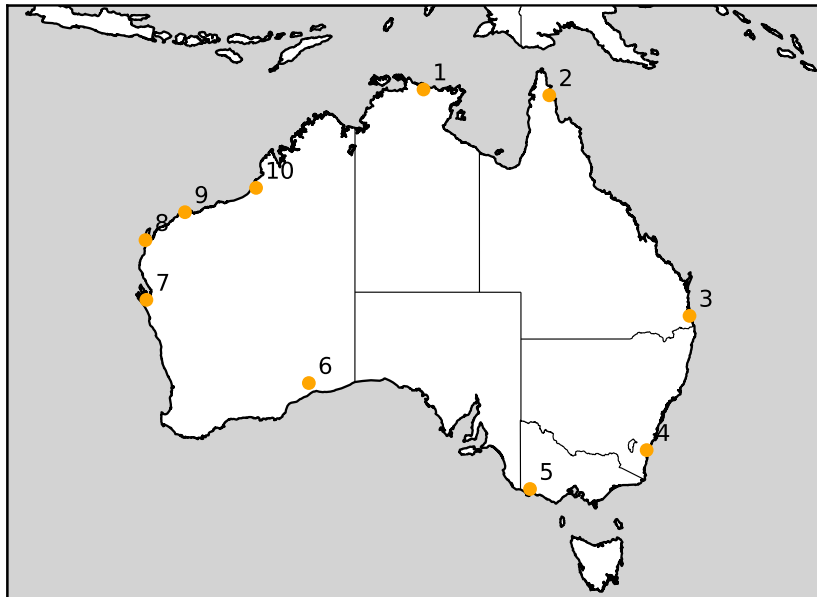

**Figure S1.** Orange points represent the locations for the wind roses shown in Fig. S3. These points are located around the coast in the Western region of Australia.

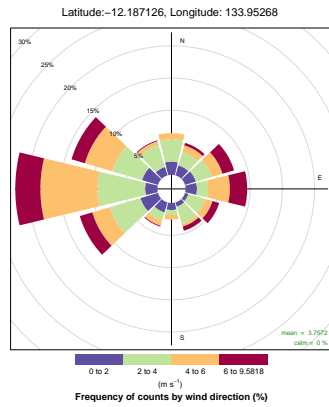

(a) Location 1

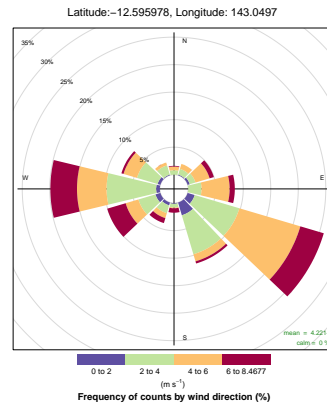

(b) Location 2

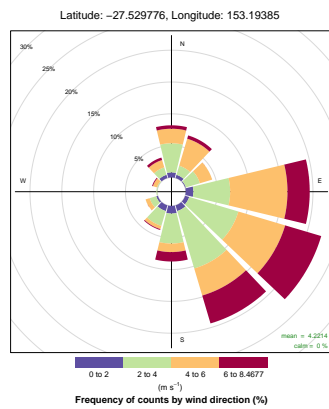

(c) Location 3

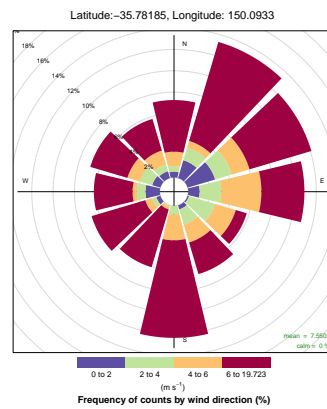

(d) Location 4

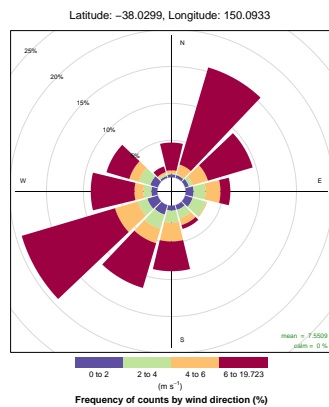

(e) Location 5

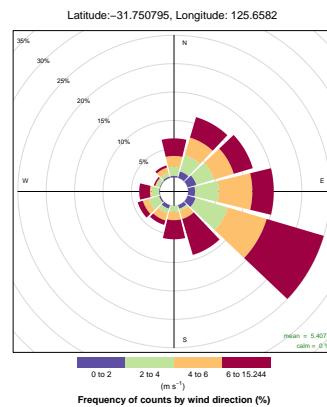

(f) Location 6

**Figure S2.** Wind roses show the frequency of occurrence of wind speed and direction available for 6 selected locations around the coast in Australia for March 2015.

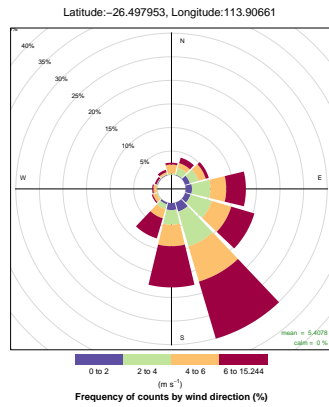

(a) Location 7

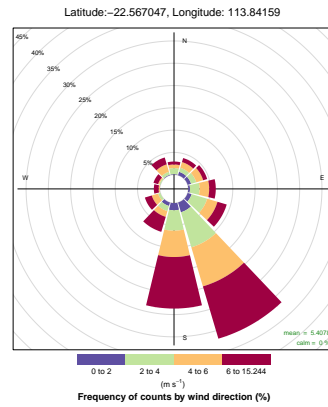

(b) Location 8

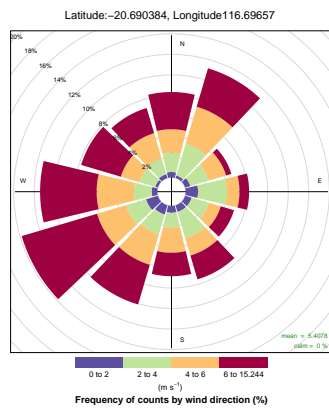

(c) Location 9

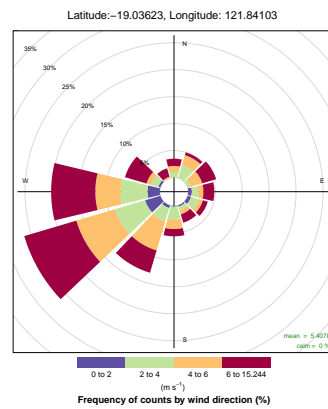

(d) Location 10

**Figure S3.** Wind roses show the frequency of occurrence of wind speed and direction available for 4 selected locations around the coast in Australia for March 2015.
